# Supplementary material
Source: MDPI journal article supplement (https://www.mdpi.com/2073-4433/14/4/684)
Supplement: s1 [file s1]

## Supplementary Materials:

# Source Apportionment of Ambient Particulate Matter (PM) in Two Western African Urban Sites (Dakar in Senegal and Bamako in Mali)

Thierno Doumbia <sup>1,\*</sup>, Catherine Liousse <sup>1</sup>, Marie-Roumy Ouafu-Leumbe <sup>2</sup>, Seydi Ababacar Ndiaye <sup>3</sup>, Eric Gardrat <sup>1</sup>, Corinne Galy-Lacaux <sup>1</sup>, Cyril Zouiten <sup>4</sup>, Véronique Yoboué <sup>5</sup> and Claire Granier <sup>1,6</sup>

<sup>1</sup> Laboratoire d'Aérogologie (LAERO), University of Toulouse, CNRS/UPS, 31100, Toulouse, France

<sup>2</sup> Department of Earth Sciences, Faculty of Sciences, University of Douala, Douala P.O. Box 2701, Cameroun

<sup>3</sup> Laboratoire de Physique de l'Atmosphère et de l'Océan-Simeon Fongang (LPAO-SF), University of Dakar, Dakar 10700, Senegal

<sup>4</sup> Géosciences Environnement Toulouse (GET), University of Toulouse, Toulouse 31400, France

<sup>5</sup> Laboratoire des Sciences de la Matière, de l'Environnement et de l'énergie Solaire, Félix Houphouët-Boigny University, Abidjan P.O. Box BP V 34, Côte d'Ivoire

<sup>6</sup> NOAA Chemical Sciences Laboratory and CIRES, University of Colorado, Boulder, CO 80305-3337, USA

\* Correspondence: thiernoudumbia@yahoo.fr or thierno.doumbia@aero.obs-mip.fr; Tel.: +33-5-6133-2766

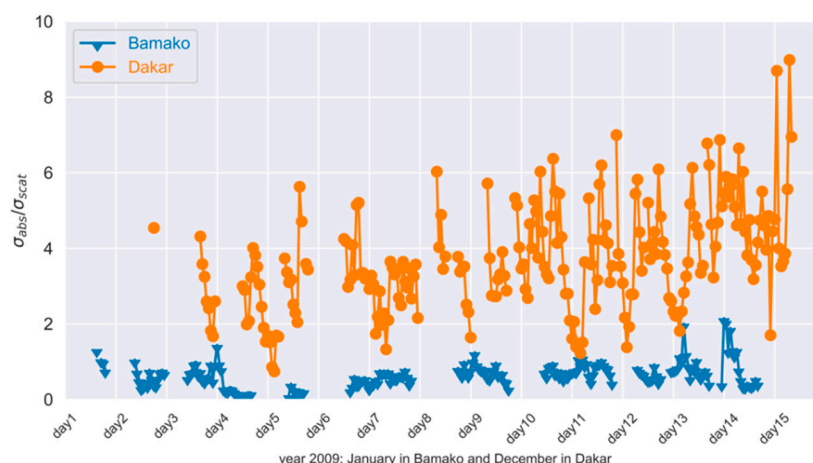

**Figure S1.** Daily evolution of  $\sigma_{\text{abs}} / \sigma_{\text{scat}}$  ratio in Bamako and Dakar.

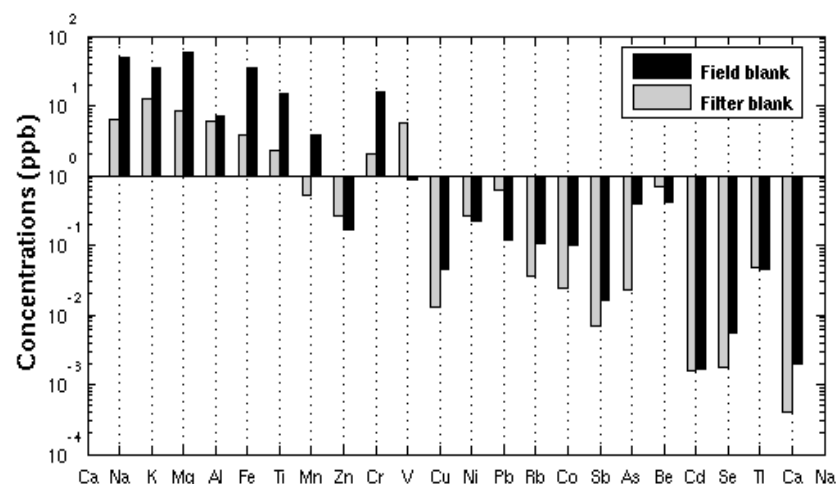

**Figure S2.** Comparison between average concentration of field blanks and filter blanks.

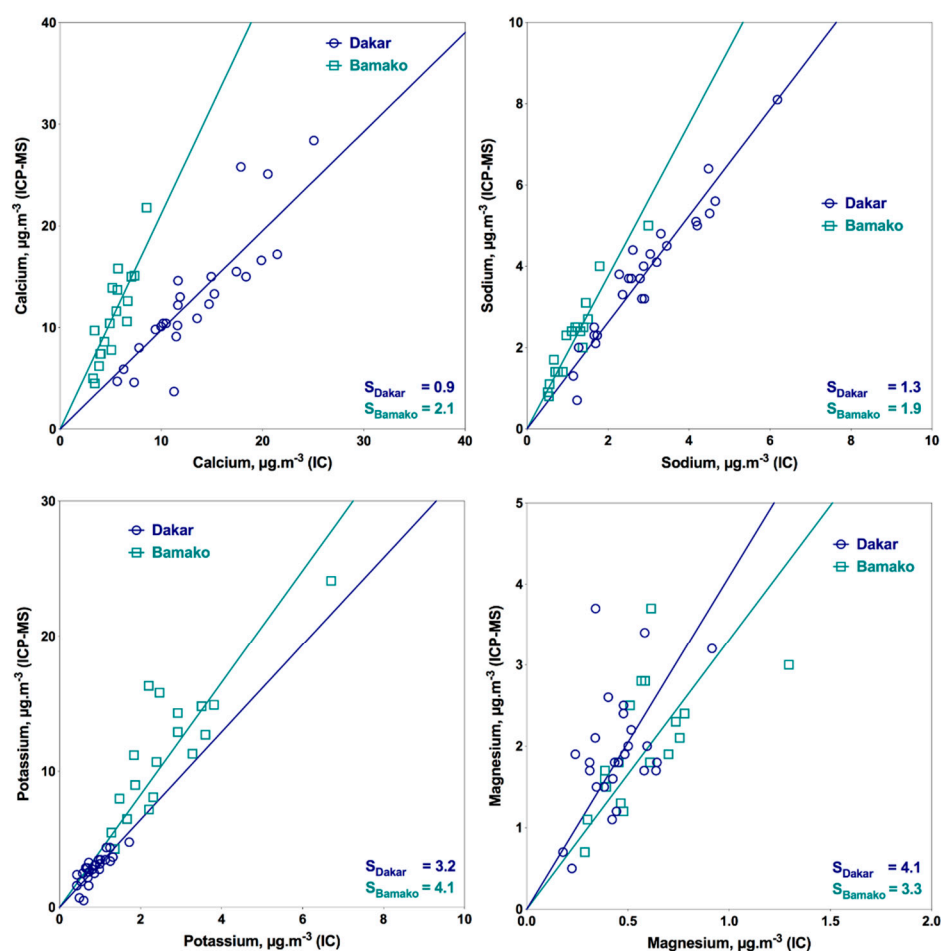

**Figure S3.** Comparison of calcium, sodium, potassium and magnesium elements measured by ICP-MS and IC, excluded the dust episode.

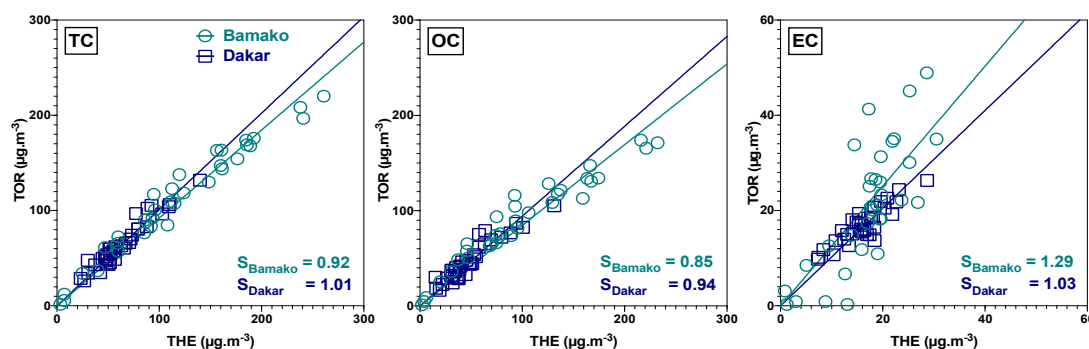

**Figure S4.** Comparison between the Thermal-Optical Reflectance (TOR) and the THERMAL (THE) methods at the two sites for TC, OC and EC. The linear regression results are displayed, S being the slope for Dakar ( $S_{Dakar}$ ) and Bamako ( $S_{Bamako}$ ) with zero intercept.

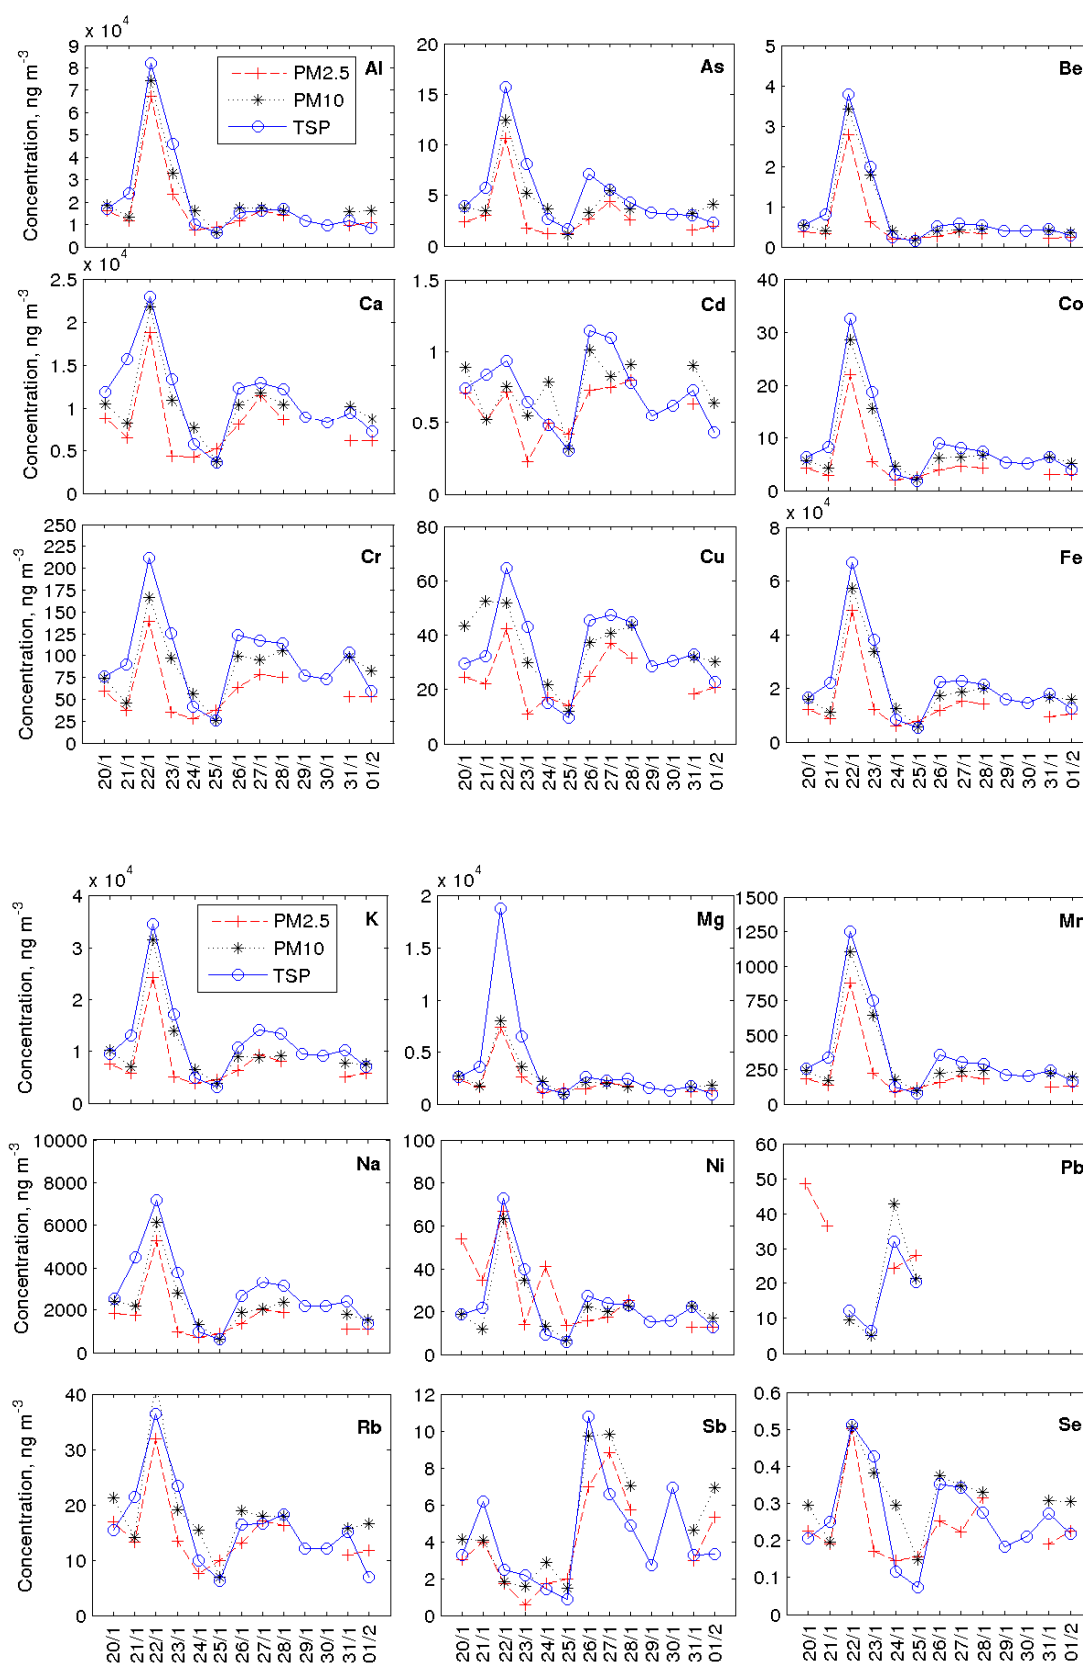

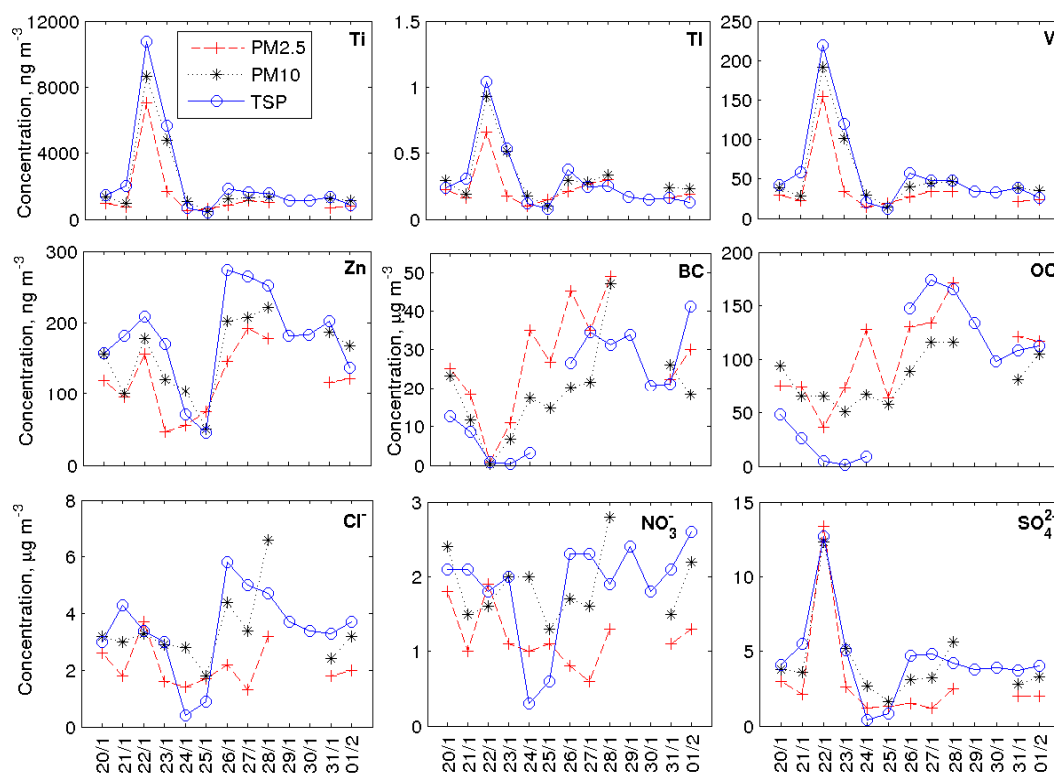

**Figure S5.** Time variations of PM<sub>2.5</sub>, PM<sub>10</sub> and TSP components concentrations measured at Bamako between 20 January and 1 February 2009.

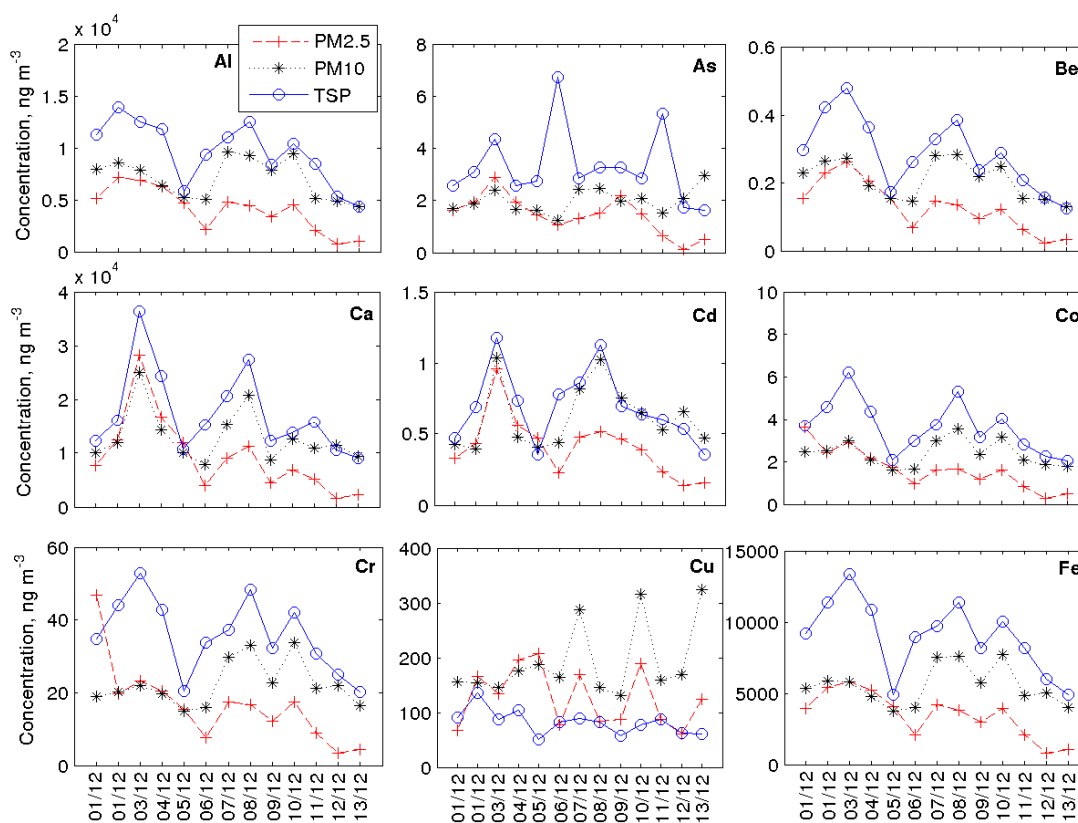

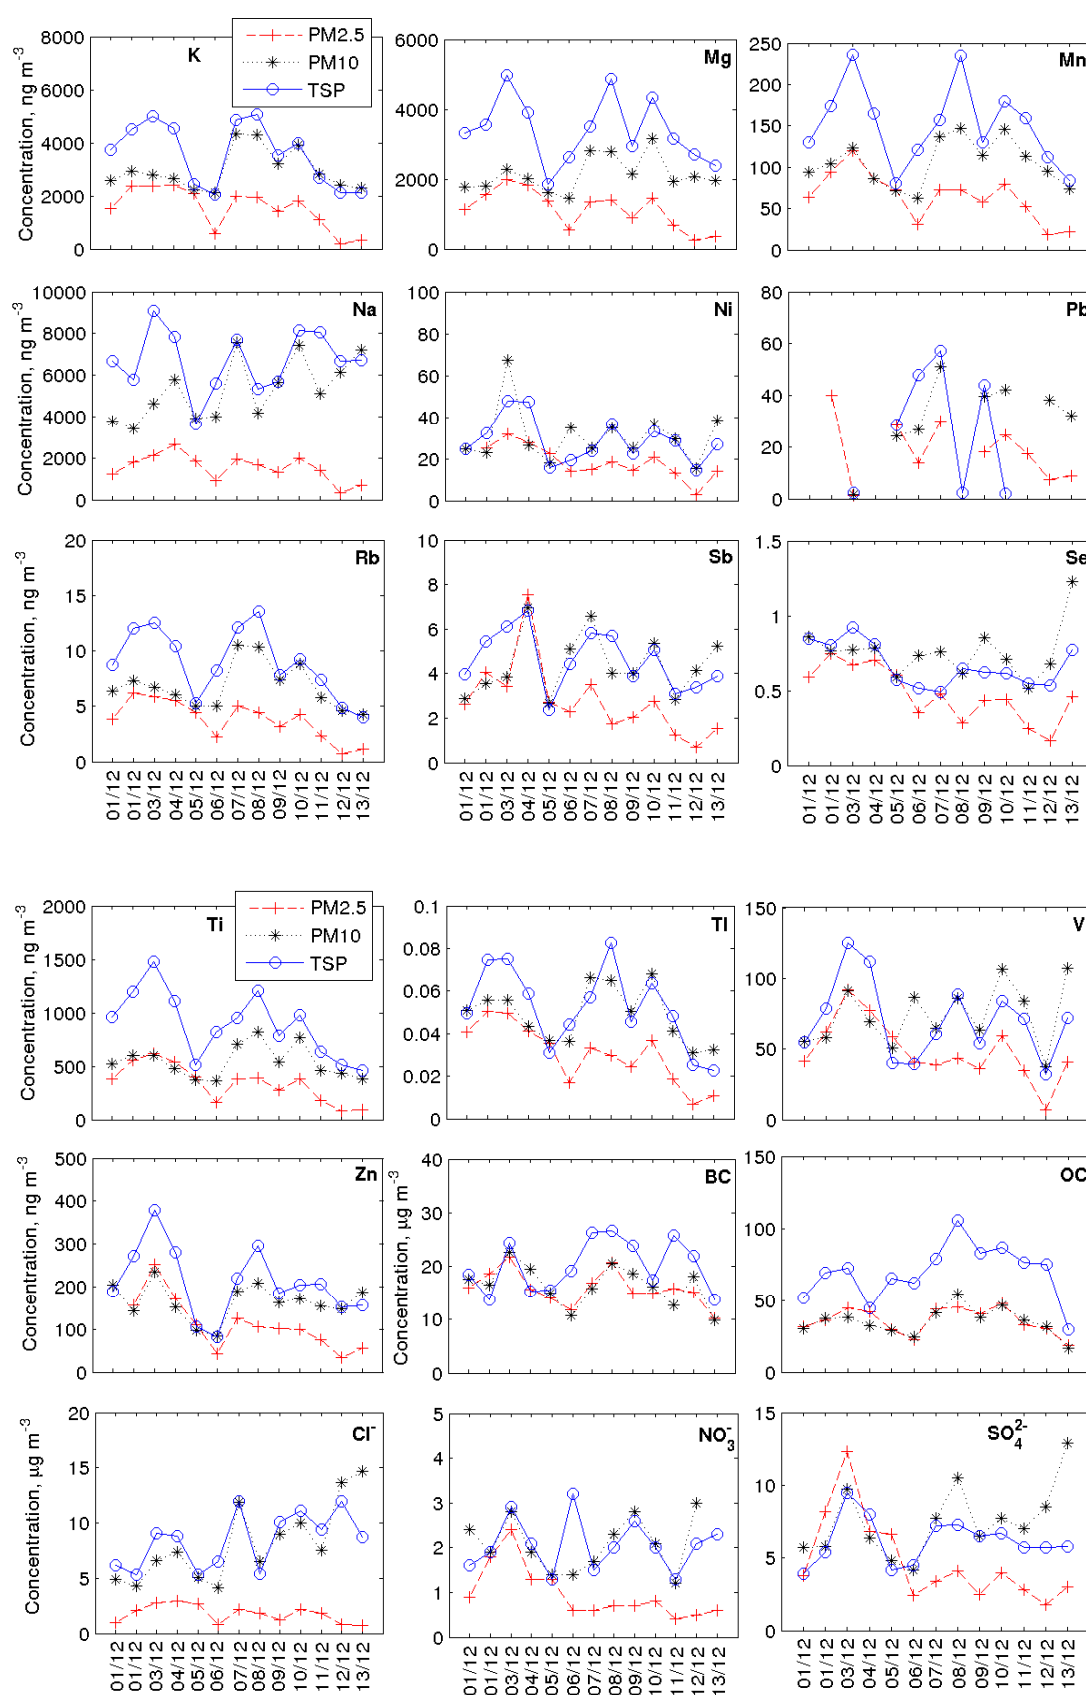

**Figure S6.** Time variations of components in PM<sub>2.5</sub>, PM<sub>10</sub> and TSP concentrations measured at Daker between 1 and 13 December 2009.

**Table S1.** Detection limits and blank values for water soluble species. The analysis was performed on 24 filter blanks and all values are in ppb.

|              | Cl <sup>-</sup> | NO <sub>3</sub> <sup>-</sup> | SO <sub>4</sub> <sup>2-</sup> | Na <sup>+</sup> | NH <sub>4</sub> <sup>+</sup> | K <sup>+</sup> | Mg <sup>2+</sup> | Ca <sup>2+</sup> |
|--------------|-----------------|------------------------------|-------------------------------|-----------------|------------------------------|----------------|------------------|------------------|
| Filter blank | 13              | 24                           | 4                             | 8               | 9                            | 2              | 0.3              | 25               |
| DL           | 3               | 6                            | 3                             | 3               | 4                            | 1              | 1                | 4                |

**Table S2.** Detection limits, vessel blank (VB) and filter blank (FB) in a matrix of 10 ml HNO<sub>3</sub> and 0.5 ml HF.

| Metals | Vessel blank (VB)<br>(µg.l <sup>-1</sup> ) | Field blank (FB)<br>(µg.l <sup>-1</sup> ) | DL <sub>VB</sub> (µg.l <sup>-1</sup> ) | DL <sub>FB</sub> (µg.l <sup>-1</sup> ) |
|--------|--------------------------------------------|-------------------------------------------|----------------------------------------|----------------------------------------|
| Ag     | 0.07                                       | 0.02                                      | 0.20                                   | 0.10                                   |
| Al     | 0.84                                       | 34                                        | 1.07                                   | 60                                     |
| As     | 0.09                                       | 0.41                                      | 0.65                                   | 0.61                                   |
| Ba     | 0.05                                       | 0.70                                      | 0.17                                   | 1.89                                   |
| Ca     | 3                                          | 49                                        | 5                                      | 221                                    |
| Cd     | 0.0005                                     | 0.006                                     | 0.0006                                 | 0.015                                  |
| Ce     | 0.001                                      | 0.03                                      | 0.004                                  | 0.13                                   |
| Co     | 0.001                                      | 0.02                                      | 0.001                                  | 0.07                                   |
| Cr     | 0.03                                       | 0.9                                       | 0.20                                   | 3.2                                    |
| Cs     | 0.0002                                     | 0.001                                     | 0.0002                                 | 0.002                                  |
| Cu     | 0.038                                      | 0.2                                       | 0.036                                  | 0.7                                    |
| Eu     | 0.001                                      | 0.002                                     | 0.003                                  | 0.008                                  |
| Fe     | 0.7                                        | 15                                        | 4.2                                    | 86                                     |
| Hf     | 0.0009                                     | 0.007                                     | 0.003                                  | 0.017                                  |
| K      | 3                                          | 57                                        | 6                                      | 102                                    |
| La     | 0.0009                                     | 0.01                                      | 0.0022                                 | 0.06                                   |
| Mg     | 0.3                                        | 7                                         | 0.8                                    | 34                                     |
| Mn     | 0.03                                       | 0.2                                       | 0.06                                   | 0.7                                    |
| Mo     | 0.004                                      | 0.07                                      | 0.011                                  | 0.24                                   |
| Na     | 3                                          | 34                                        | 6                                      | 132                                    |
| Ni     | 0.04                                       | 0.12                                      | 0.05                                   | 0.19                                   |
| Pb     | 0.006                                      | 0.11                                      | 0.018                                  | 0.38                                   |
| Rb     | 0.01                                       | 0.10                                      | 0.01                                   | 0.16                                   |
| Sb     | 0.002                                      | 0.39                                      | 0.004                                  | 3.03                                   |
| Se     | 0.07                                       | 0.05                                      | 0.48                                   | 0.03                                   |
| Sm     | 0.0002                                     | 0.003                                     | 0.0003                                 | 0.012                                  |
| Sn     | 0.03                                       | 11                                        | 0.08                                   | 20                                     |
| Sr     | 0.02                                       | 0.2                                       | 0.07                                   | 1.2                                    |
| Th     | 0.0002                                     | 0.002                                     | 0.0006                                 | 0.006                                  |
| Ti     | 0.07                                       | 4                                         | 0.29                                   | 10                                     |
| U      | 0.001                                      | 0.006                                     | 0.005                                  | 0.025                                  |
| V      | 0.01                                       | 0.05                                      | 0.03                                   | 0.17                                   |
| W      | 0.002                                      | 0.03                                      | 0.005                                  | 0.09                                   |
| Zn     | 0.5                                        | 15                                        | 4                                      | 120                                    |
| Zr     | 0.01                                       | 0.2                                       | 0.05                                   | 0.5                                    |
| Be     | 0.001                                      | 0.002                                     | 0.001                                  | 0.002                                  |
| Tl     | 0.0001                                     | 0.002                                     | 0.0001                                 | 0.008                                  |

**Table S3.** Certified/non certified and resulting concentration for elements in SRM 1648.

| Element | Concentration<br>( $\mu\text{g}\cdot\text{g}^{-1}$ ) | SD (%) | Certified SRM 1648<br>( $\mu\text{g}\cdot\text{g}^{-1}$ ) | Recovery (%) |
|---------|------------------------------------------------------|--------|-----------------------------------------------------------|--------------|
| Na      | 4416 $\pm$ 1277                                      | 3.5    | 4250 $\pm$ 20                                             | 104          |
| Mg      | 6732 $\pm$ 1723                                      | 3.9    | (8000)                                                    | 84           |
| Al      | 30025 $\pm$ 7885                                     | 3.8    | 34200 $\pm$ 1100                                          | 88           |
| K       | 10051 $\pm$ 2594                                     | 3.9    | 10500 $\pm$ 100                                           | 96           |
| Cr      | 243 $\pm$ 73                                         | 3.3    | 403 $\pm$ 12                                              | 60           |
| Mn      | 729 $\pm$ 188                                        | 3.9    | 786 $\pm$ 17                                              | 93           |
| Fe      | 33207 $\pm$ 8425                                     | 3.9    | 39100 $\pm$ 1000                                          | 85           |
| Co      | 16 $\pm$ 4                                           | 3.9    | (18)                                                      | 88           |
| Ni      | 81 $\pm$ 24                                          | 3.4    | 82 $\pm$ 3                                                | 99           |
| Cu      | 543 $\pm$ 135                                        | 4.0    | 609 $\pm$ 27                                              | 89           |
| Zn      | 4489 $\pm$ 1222                                      | 3.7    | 4760 $\pm$ 140                                            | 94           |
| As      | 115 $\pm$ 31                                         | 3.7    | 115 $\pm$ 10                                              | 100          |
| Se      | 27 $\pm$ 10                                          | 2.7    | 27 $\pm$ 1                                                | 99           |
| Be      | 3.2 $\pm$ 0.7                                        | 3.4    | -                                                         | -            |
| Cd      | 68 $\pm$ 19                                          | 3.6    | 75 $\pm$ 7                                                | 91           |
| Sb      | 37 $\pm$ 9                                           | 4.1    | (45)                                                      | 83           |
| Cs      | 3.2 $\pm$ 0.9                                        | 3.6    | (3)                                                       | 105          |
| Ba      | 668 $\pm$ 167                                        | 4.0    | (737)                                                     | 91           |
| Ce      | 46 $\pm$ 12                                          | 3.9    | (55)                                                      | 83           |
| Ca      | 37781 $\pm$ 7883                                     | 3.9    | 58400 $\pm$ 1900                                          | -            |
| Rb      | 50 $\pm$ 13                                          | 3.2    | (52)                                                      | 69           |
| Pb      | 6413 $\pm$ 1014                                      | 6.3    | 6550 $\pm$ 80                                             | 98           |
| Th      | 7.3 $\pm$ 1.1                                        | 6.4    | (7.4)                                                     | 98           |
| U       | 5.4 $\pm$ 0.8                                        | 6.5    | 5.5 $\pm$ 0.1                                             | 97           |
| V       | 119 $\pm$ 30                                         | 3.9    | 127 $\pm$ 7                                               | 94           |
| Ti      | 3332 $\pm$ 784                                       | 4.2    | (4000)                                                    | 83           |

SD, the relative standard deviation between replicates ( $n = 9$ ). Values in parenthesis are non-certified and are given for information.

**Table S4.** Summary of the Thermal Optical Reflectance (TOR) and THERMAL (THE) protocols.

| Protocol                        | TOR                               | Thermal                                                            |
|---------------------------------|-----------------------------------|--------------------------------------------------------------------|
| Combustion environment for OC   | He                                | O <sub>2</sub>                                                     |
| Combustion environment for BC   | 98%He, 2%O <sub>2</sub>           | O <sub>2</sub>                                                     |
| Temperature plateau for OC (°C) | 550                               | 340                                                                |
| Residence time for OC (s)       | 580                               | 7200                                                               |
| Temperature plateau for BC (°C) | 800                               | 1100                                                               |
| Residence time for EC (s)       | 580                               | 600                                                                |
| Optical/charring correction     | Reflectance                       | 10% of OC; EC decomposition of<br>0.22% per min during OC analysis |
| Convert and detector            | Methanator<br>FID/CH <sub>4</sub> | Coulometric titration/CO <sub>2</sub>                              |

**Table S5.** Comparison of no decarbonation (noDC) and decarbonation (DC) procedures on OC, EC and TC (OC + EC) measurements at Bamako.

| Comparison              |     | Filter | Mean ratio      |  | Correlation | Mean values ( $\mu\text{g.cm}^{-2}$ ) |        |           |                |
|-------------------------|-----|--------|-----------------|--|-------------|---------------------------------------|--------|-----------|----------------|
| noDC                    | DC  | n      | DC/noDC         |  | $r^2$       | noDC                                  | DC     | noDC - DC | Difference (%) |
| <b>PM<sub>2.5</sub></b> |     |        |                 |  |             |                                       |        |           |                |
| OC1                     | OC1 | 11     | $0.03 \pm 0.05$ |  | -0.86       | 8.46                                  | 0.23   | 8.23      | -97            |
| OC2                     | OC2 | 11     | $0.11 \pm 0.20$ |  | 0.02        | 50.11                                 | 4.63   | 45.48     | -91            |
| OC3                     | OC3 | 11     | $0.40 \pm 0.15$ |  | 0.66        | 49.40                                 | 19.40  | 29.99     | -61            |
| OC4                     | OC4 | 11     | $0.72 \pm 0.12$ |  | 0.47        | 12.19                                 | 8.77   | 3.42      | -28            |
| EC1                     | EC1 | 11     | $1.33 \pm 0.11$ |  | 1.00        | 96.61                                 | 124.84 | -28.24    | 29             |
| EC2                     | EC2 | 11     | $0.15 \pm 0.03$ |  | 0.92        | 16.44                                 | 2.55   | 13.89     | -84            |
| EC3                     | EC3 | 11     | $1.02 \pm 0.44$ |  | 0.05        | 0.72                                  | 0.71   | 0.02      | -2             |
| OP                      | OP  | 11     | $0.90 \pm 0.24$ |  | 0.94        | 65.36                                 | 63.11  | 2.25      | -3             |
| TC                      | TC  | 11     | $0.70 \pm 0.08$ |  | 0.98        | 233.93                                | 160.97 | 72.96     | -31            |
| OC                      | OC  | 11     | $0.51 \pm 0.11$ |  | 0.94        | 185.44                                | 95.97  | 89.47     | -48            |
| EC                      | EC  | 11     | $1.42 \pm 0.29$ |  | 0.91        | 48.49                                 | 64.99  | -16.51    | 34             |
| <b>PM<sub>10</sub></b>  |     |        |                 |  |             |                                       |        |           |                |
| OC1                     | OC1 | 11     | $0.01 \pm 0.05$ |  | 0.89        | 8.18                                  | 0.09   | 8.09      | -99            |
| OC2                     | OC2 | 11     | $0.08 \pm 0.05$ |  | 0.92        | 47.66                                 | 2.72   | 44.94     | -94            |
| OC3                     | OC3 | 11     | $0.48 \pm 0.11$ |  | 0.95        | 44.49                                 | 20.00  | 24.49     | -55            |
| OC4                     | OC4 | 11     | $0.83 \pm 0.15$ |  | 0.22        | 11.60                                 | 9.58   | 2.02      | -17            |
| EC1                     | EC1 | 11     | $1.29 \pm 0.10$ |  | 1.00        | 88.18                                 | 110.23 | -22.05    | 25             |
| EC2                     | EC2 | 11     | $0.18 \pm 0.05$ |  | 0.72        | 15.64                                 | 2.84   | 12.80     | -82            |
| EC3                     | EC3 | 11     | $1.27 \pm 0.45$ |  | -0.24       | 0.73                                  | 0.88   | -0.15     | 20             |
| OP                      | OP  | 11     | $1.02 \pm 0.35$ |  | 0.84        | 63.65                                 | 68.03  | -4.38     | 7              |
| TC                      | TC  | 11     | $0.69 \pm 0.05$ |  | 1.00        | 216.48                                | 146.27 | 70.21     | -32            |
| OC                      | OC  | 11     | $0.57 \pm 0.10$ |  | 0.94        | 175.58                                | 100.36 | 75.23     | -43            |
| EC                      | EC  | 11     | $1.28 \pm 0.37$ |  | 0.77        | 40.90                                 | 45.91  | -5.01     | 12             |
| <b>All</b>              |     |        |                 |  |             |                                       |        |           |                |
| OC1                     | OC1 | 22     | $0.02 \pm 0.03$ |  | -0.29       | 8.32                                  | 0.15   | 8.17      | -98            |
| OC2                     | OC2 | 22     | $0.09 \pm 0.15$ |  | 0.11        | 48.89                                 | 3.68   | 45.21     | -92            |
| OC3                     | OC3 | 22     | $0.44 \pm 0.13$ |  | 0.74        | 46.94                                 | 19.70  | 27.24     | -58            |
| OC4                     | OC4 | 22     | $0.78 \pm 0.15$ |  | 0.27        | 11.90                                 | 9.17   | 2.72      | -23            |
| EC1                     | EC1 | 22     | $1.31 \pm 0.10$ |  | 1.00        | 92.39                                 | 117.54 | -25.14    | 27             |
| EC2                     | EC2 | 22     | $0.17 \pm 0.04$ |  | 0.79        | 16.04                                 | 2.70   | 13.35     | -83            |
| EC3                     | EC3 | 22     | $1.15 \pm 0.45$ |  | -0.09       | 0.73                                  | 0.79   | -0.07     | 9              |
| OP                      | OP  | 22     | $0.96 \pm 0.30$ |  | 0.88        | 64.51                                 | 65.57  | -1.06     | 2              |
| TC                      | TC  | 22     | $0.70 \pm 0.06$ |  | 0.99        | 225.21                                | 153.62 | 71.59     | -32            |
| OC                      | OC  | 22     | $0.54 \pm 0.11$ |  | 0.93        | 180.51                                | 98.16  | 82.35     | -46            |
| EC                      | EC  | 22     | $1.35 \pm 0.33$ |  | 0.82        | 44.69                                 | 55.45  | -10.76    | 24             |



**Table S6.** Comparison of no decarbonation (noDC) and decarbonation (DC) procedures on OC, EC and TC (OC + EC) measurements at Dakar.

| Comparison              |     | Filter | Mean ratio  |       | Correlation    | Mean values |        |           |                |
|-------------------------|-----|--------|-------------|-------|----------------|-------------|--------|-----------|----------------|
| noDC                    | DC  | n      | DC/noDC     |       | r <sup>2</sup> | noDC        | DC     | noDC - DC | Difference (%) |
| <b>PM<sub>2.5</sub></b> |     |        |             |       |                |             |        |           |                |
| OC1                     | OC1 | 13     | 1.08 ± 1.08 | 0.25  |                | 4.47        | 2.98   | 1.49      | -33            |
| OC2                     | OC2 | 13     | 0.99 ± 0.29 | 0.30  |                | 27.63       | 26.56  | 1.07      | -4             |
| OC3                     | OC3 | 13     | 0.97 ± 0.26 | 0.13  |                | 27.85       | 25.96  | 1.89      | -7             |
| OC4                     | OC4 | 13     | 0.46 ± 0.09 | 0.06  |                | 11.38       | 5.13   | 6.25      | -55            |
| EC1                     | EC1 | 13     | 1.21 ± 0.34 | 0.19  |                | 45.78       | 53.11  | -7.33     | 16             |
| EC2                     | EC2 | 13     | 0.17 ± 0.08 | 0.31  |                | 10.18       | 1.39   | 8.79      | -86            |
| EC3                     | EC3 | 13     | 1.23 ± 0.46 | -0.21 |                | 0.54        | 0.63   | -0.09     | 16             |
| OP                      | OP  | 13     | 0.68 ± 0.39 | 0.23  |                | 17.66       | 9.93   | 7.72      | -44            |
| TC                      | TC  | 13     | 0.93 ± 0.23 | 0.37  |                | 127.82      | 115.75 | 12.07     | -9             |
| OC                      | OC  | 13     | 0.82 ± 0.24 | 0.22  |                | 88.98       | 69.67  | 19.31     | -22            |
| EC                      | EC  | 13     | 1.20 ± 0.21 | 0.51  |                | 38.84       | 46.08  | -7.25     | 19             |
| <b>PM<sub>10</sub></b>  |     |        |             |       |                |             |        |           |                |
| OC1                     | OC1 | 13     | 0.05 ± 0.05 | 0.35  |                | 3.95        | 0.06   | 3.89      | -98            |
| OC2                     | OC2 | 13     | 0.05 ± 0.01 | 0.29  |                | 28.80       | 1.27   | 27.53     | -96            |
| OC3                     | OC3 | 13     | 0.61 ± 0.19 | 0.11  |                | 25.79       | 14.86  | 10.93     | -42            |
| OC4                     | OC4 | 13     | 0.70 ± 0.22 | -0.34 |                | 13.49       | 9.01   | 4.48      | -33            |
| EC1                     | EC1 | 13     | 1.05 ± 0.11 | 0.94  |                | 45.54       | 48.44  | -2.91     | 6              |
| EC2                     | EC2 | 13     | 0.27 ± 0.10 | 0.93  |                | 6.98        | 1.59   | 5.38      | -77            |
| EC3                     | EC3 | 13     | 1.61 ± 0.37 | 0.61  |                | 0.54        | 0.84   | -0.30     | 56             |
| OP                      | OP  | 13     | 0.82 ± 0.52 | 0.42  |                | 13.30       | 9.60   | 3.70      | -28            |
| TC                      | TC  | 13     | 0.62 ± 0.05 | 0.96  |                | 125.08      | 76.16  | 48.93     | -39            |
| OC                      | OC  | 13     | 0.41 ± 0.06 | 0.87  |                | 85.94       | 34.45  | 51.49     | -60            |
| EC                      | EC  | 13     | 1.08 ± 0.15 | 0.77  |                | 39.15       | 41.71  | -2.56     | 7              |
| <b>All</b>              |     |        |             |       |                |             |        |           |                |
| OC1                     | OC1 | 26     | 0.72 ± 1.00 | 0.15  |                | 4.21        | 1.52   | 2.69      | -64            |
| OC2                     | OC2 | 26     | 0.52 ± 0.52 | -0.01 |                | 28.22       | 13.91  | 14.30     | -51            |
| OC3                     | OC3 | 26     | 0.79 ± 0.29 | 0.20  |                | 26.82       | 20.41  | 6.41      | -24            |
| OC4                     | OC4 | 26     | 0.58 ± 0.21 | 0.22  |                | 12.43       | 7.07   | 5.36      | -43            |
| EC1                     | EC1 | 26     | 1.13 ± 0.26 | 0.58  |                | 45.66       | 50.78  | -5.12     | 11             |
| EC2                     | EC2 | 26     | 0.22 ± 0.10 | 0.45  |                | 8.58        | 1.49   | 7.09      | -83            |
| EC3                     | EC3 | 26     | 1.42 ± 0.45 | 0.26  |                | 0.54        | 0.74   | -0.20     | 36             |
| OP                      | OP  | 26     | 0.75 ± 0.46 | 0.32  |                | 15.48       | 9.77   | 5.71      | -37            |
| TC                      | TC  | 26     | 0.78 ± 0.23 | 0.43  |                | 126.45      | 95.96  | 30.50     | -24            |
| OC                      | OC  | 26     | 0.62 ± 0.27 | 0.26  |                | 87.46       | 52.06  | 35.40     | -40            |
| EC                      | EC  | 26     | 1.14 ± 0.19 | 0.63  |                | 38.99       | 43.90  | -4.90     | 13             |

BC components were assumed to consist of the sum of the three EC fractions obtained by TOR minus the pyrolysis correction (OP) so that  $EC = EC1 + EC2 + EC3 - OP$ . OC components were assumed to consist of the four fractions plus the pyrolysis correction obtained by TOR so that  $OC = OC1 + OC2 + OC3 + OC4 + OP$ .

**Table S7.** Quality control performance measures for carbonaceous analyses in Bamako and Dakar.

| DRI instrument (TOR)                       |  |      |      |
|--------------------------------------------|--|------|------|
| Instrument blank ( $\mu\text{g.cm}^{-2}$ ) |  | TC   | EC   |
| Average                                    |  | 0.13 | 0.01 |
| Standard deviation                         |  | 0.15 | 0.04 |
|                                            |  |      | OC   |
|                                            |  |      | 0.12 |
|                                            |  |      | 0.11 |

|                                       |                                   |                                    |           |
|---------------------------------------|-----------------------------------|------------------------------------|-----------|
| Detection limit                       | 0.45                              | 0.13                               | 0.33      |
| Number of samples                     | 16                                | 16                                 | 16        |
| Field blank ( $\mu\text{g.cm}^{-2}$ ) | <b>TC</b>                         | <b>EC</b>                          | <b>OC</b> |
| Average                               | 4.29                              | 0.63                               | 3.66      |
| Standard deviation                    | 2.85                              | 0.53                               | 2.36      |
| Detection limit                       | 8.55                              | 1.59                               | 7.08      |
| Number of samples                     | 36                                | 36                                 | 36        |
| <b>Carbon analyzer (Thermal)</b>      |                                   |                                    |           |
| Calibration (sucrose)                 | low carbon (< 25 $\mu\text{gC}$ ) | High carbon (> 25 $\mu\text{gC}$ ) |           |
| Ratio of sucrose to mass target       | 1.02                              | 1.04                               |           |
| Standard deviation                    | 0.05                              | 0.04                               |           |
| Number of samples                     | 23                                | 22                                 |           |
| Field blank ( $\mu\text{g.cm}^{-2}$ ) | <b>TC</b>                         | <b>EC</b>                          | <b>OC</b> |
| Average                               | 1.62                              | 0.69                               | 0.93      |
| Standard deviation                    | 0.74                              | 0.63                               | 0.68      |
| Detection limit                       | 2.22                              | 1.89                               | 2.04      |
| Number of samples                     | 22                                | 15                                 | 15        |

**Table S8.** Comparison between measured and PMF calculated concentrations (in  $\text{ng.m}^{-3}$ ) except for PM (in  $\mu\text{g.m}^{-3}$ ) in Bamako for studied chemical species.

| Species                       | Measured | PMF modeled | $r^2$ | Uncertainty (%) |
|-------------------------------|----------|-------------|-------|-----------------|
| PM ( $\mu\text{g.m}^{-3}$ )   | 430.01   | 380.67      | 0.25  | 11              |
| OC                            | 98295    | 84466       | 0.44  | 14              |
| EC                            | 24600    | 20765       | 0.35  | 16              |
| Al                            | 15457    | 15280       | 0.96  | 1               |
| Fe                            | 15423    | 15438       | 0.99  | 0               |
| Ca <sup>2+</sup>              | 5774     | 5775        | 0.98  | 0               |
| SO <sub>4</sub> <sup>2-</sup> | 3103     | 3078        | 0.97  | 1               |
| K <sup>+</sup>                | 2952     | 2934        | 0.99  | 1               |
| Cl <sup>-</sup>               | 2953     | 2902        | 0.94  | 2               |
| NO <sub>3</sub> <sup>-</sup>  | 1649     | 1646        | 0.93  | 0               |
| Na <sup>+</sup>               | 1541     | 1542        | 0.99  | 0               |
| Ti                            | 1368     | 1335        | 1.00  | 2               |
| Mg <sup>2+</sup>              | 672      | 674         | 0.99  | 0               |
| Mn                            | 229      | 227         | 0.99  | 1               |
| Zn                            | 144      | 142         | 0.90  | 1               |
| Cr                            | 73       | 72          | 0.97  | 1               |
| V                             | 38       | 38          | 1.00  | 1               |
| Cu                            | 30       | 29          | 0.79  | 3               |
| Ni                            | 21       | 18          | 0.23  | 15              |
| Rb                            | 15       | 14          | 0.94  | 1               |
| Co                            | 6        | 6           | 0.99  | 1               |
| Sb                            | 4        | 4           | 0.67  | 3               |
| As                            | 3        | 3           | 0.85  | 3               |
| Cd                            | 1        | 1           | 0.26  | 1               |
| Be                            | 0.5      | 0.5         | 0.99  | 4               |
| Se                            | 0.3      | 0.3         | 0.94  | 0               |
| Tl                            | 0.2      | 0.2         | 0.92  | 4               |

**Table S9: Comparison between measured and PMF calculated concentrations (in ng.m<sup>-3</sup>) except for PM (in µg.m<sup>-3</sup>) in Dakar for all chemical species.**

| Species                       | Measured | PMF modeled | r <sup>2</sup> | Uncertainty (%) |
|-------------------------------|----------|-------------|----------------|-----------------|
| PM (µg.m <sup>-3</sup> )      | 170.36   | 189.67      | 0.82           | 10              |
| OC                            | 46057    | 47941       | 0.96           | 4               |
| EC                            | 17131    | 17042       | 0.70           | -1              |
| Ca <sup>2+</sup>              | 12038    | 12189       | 0.83           | 1               |
| Al                            | 6934     | 7142        | 0.96           | 3               |
| Cl <sup>-</sup>               | 6074     | 6190        | 0.97           | 2               |
| SO <sub>4</sub> <sup>2-</sup> | 6073     | 6038        | 0.98           | -1              |
| Fe                            | 5975     | 5979        | 0.98           | 0               |
| Na <sup>+</sup>               | 3765     | 3785        | 0.98           | 1               |
| NO <sub>3</sub> <sup>-</sup>  | 1662     | 1683        | 0.78           | 1               |
| K <sup>+</sup>                | 829      | 835         | 0.92           | 1               |
| Ti                            | 583      | 586         | 0.98           | 1               |
| Mg <sup>2+</sup>              | 549      | 553         | 0.99           | 1               |
| Zn                            | 160      | 160         | 0.93           | 0               |
| Cu                            | 130      | 129         | 0.93           | 0               |
| Mn                            | 105      | 108         | 0.96           | 3               |
| V                             | 62       | 61          | 0.86           | -2              |
| Ni                            | 26       | 28          | 0.78           | 7               |
| Cr                            | 24       | 24          | 0.84           | -1              |
| Rb                            | 6        | 6           | 0.97           | -5              |
| Sb                            | 4        | 4           | 0.73           | 3               |
| Co                            | 3        | 3           | 0.95           | 2               |
| As                            | 2        | 2           | 0.70           | -5              |
| Cd                            | 1        | 1           | 0.85           | -2              |
| Se                            | 1        | 1           | 0.83           | 1               |
| Be                            | 0.2      | 0.2         | 0.98           | 0               |
| Tl                            | 0.04     | 0.05        | 0.93           | 4               |
